# Supplementary material for: Management of Postoperative Pain after Elective Craniotomy: A Prospective Randomized Controlled Trial of a Neurosurgical Enhanced Recovery after Surgery (ERAS) Program
Source: PubMed Central journal article supplement (PMC7359387; doi:10.7150/ijms.46403), 2020-06-21
Supplement: ijmsv17p1541s1.pdf [file ijmsv17p1541s1.pdf]

# Supplementary Information

## Supplementary file 1. Research Protocol

## Supplementary file 2. Neurosurgical ERAS record checklist

## Supplementary file 3. ERAS Protocol For Elective Craniotomies

### Supplementary file 1. Research Protocol

#### Project summary

Although ERAS programs have gained increasing acceptance in various surgical specialties, there is currently no established neurosurgical ERAS protocol for patients undergoing elective craniotomy reported in literature. Here, we try to evaluate the design, implementation, safety and efficacy of a novel neurosurgical enhanced recovery after surgery (ERAS) protocol for elective craniotomy in a tertiary center located in China. A multi-disciplinary neurosurgical ERAS protocol for elective craniotomy was developed, based on the best available evidence. A total of 300 patients undergoing elective craniotomy between Oct 2016 and Nov 2017 were enrolled in a randomized clinical trial (RCT) comparing our novel ERAS protocol to conventional neurosurgical perioperative management. The primary end point was the evaluation of postoperative pain by means of a verbal numerical rating scale (NRS). Secondary end points included Secondary outcome measures included Median total hospital length of stay from admission to discharge, Median post procedure length of stay from end of procedure to discharge, Readmission rate 30 day all cause readmission rate, Reoperation rate reoperation for any indication within 30 days and Total cost of hospitalization (RMB). This multidisciplinary, evidence-based neurosurgical ERAS protocol for craniotomy appears to have significant benefits compared to conventional perioperative management. Implementation of a neurosurgical ERAS protocol for elective craniotomies, which resulted in alleviating postoperative pain and enhancing recovery after surgery.

#### General information

- Public title: Clinical study on the development and efficacy evaluation of Enhanced Recovery After Surgery (ERAS) in Neurosurgery
- Registration number: ChiCTR-INR-16009662
- Date of Registration: 2016-10-27
- Date of approved by ethic committee: 2016-10-25
- Name of the ethic committee: Ethical committee of Tangdu Hospital, Fourth Military Medical University
- Primary sponsor: Department of neurosurgery, Tangdu Hospital, Fourth Military Medical University
- Primary sponsor's address: 569 Xinsi Rd, Baqiao District, Xi'an, Shaanxi, China

- Source(s) of funding: China national health and Family Planning Commission
- Study leader: Shiming He, MD., PhD.  
Phone: +86 29 84717737  
Fax: +86 29 84717737  
Email: he-shiming@163.com
- Study design: Randomized parallel controlled trial

### **Rationale & background information**

Conventional craniotomy is typically associated with significant physiologic stressors and prolonged functional recovery. An excessive stress response may predispose patients to an increased risk of cardiovascular and cerebrovascular complications, nutrient malabsorption and delayed convalescence[1]. With the increasing understanding of perioperative pathophysiology, the concept of enhanced recovery after surgery (ERAS), originally introduced by Kehlet in 1997, has been established in an effort to improve functional outcomes after surgery and decrease perioperative morbidity[2, 3]. Several ERAS protocols have gained acceptance in a wide variety of surgical subspecialties[4-8]. However, to the best of our knowledge, ERAS protocols within neurosurgery, specifically for elective craniotomy, have not been established. Owing to the rapid development of neurosurgery in recent decades worldwide, minimally invasive craniotomy have benefited huge numbers of patients with improved patient recovery and satisfaction[9]. Based on the core concept of evidence-based review of ERAS and ERAS protocols for abdominal and pelvic surgeries, Hagan et al. proposed a preliminary set of recommendations including seventeen ERAS items for creating a standardized protocol for craniotomy[10]. However, the safety and feasibility of implementing a detailed neurosurgical ERAS protocol for craniotomy in a clinical setting has not been previously described in the literature. Here, we describe our experience with the implementation of a novel, multi-disciplinary, evidence-based neurosurgical ERAS protocol for elective craniotomy at a large tertiary hospital in China.

### **Study goals and objectives**

The aim of this study was to prospectively evaluate the efficacy of improvement on postoperative pain after elective craniotomies based on neurosurgical enhanced recovery after surgery (ERAS) protocol for elective craniotomies.

### **Study Design**

Study type: Interventional study

Study phase: New Treatment Measure Clinical Study

Study design: Randomized parallel controlled trial

Inclusion criteria:

- (1) Patients with single intracranial lesion and medically eligible for elective craniotomy;
- (2) Age between 18-65 years;
- (3) Patients who are able to communicate well with the medical staff;
- (4) Patients who understand and sign the Informed Consent, with good compliance in the study.

Exclusion criteria:

- (1) non-brain tumor patients, such as severe craniocerebral injury leading to bilateral mydriasis, vital signs were not stable;
- (2) children (patients less than 18 years), awake craniotomy;

- (3) patients with severe spinal cord injury shock;
- (4) other trauma caused by preoperative cardiac arrest, combined with severe limb fractures or thoracic and abdominal injury;
- (5) infection or inflammation in the surgical area;
- (6) serious complications of disease (blood system, respiratory system, digestive system, etc.) patients;
- (7) patients with severe heart disease (such as coronary heart disease, myocardial infarction, etc.);
- (8) Patients with ULN and / or renal function (Cr) $>$  1.5 times ULN with liver function (ALT, AST) $>$  2 times;
- (9) patients with mental illness;
- (10) Women who have a childcare plan within 6 months of pregnancy or breastfeeding;
- (11) Other patients who were considered unsuitable for inclusion in the study.

### **Methodology**

#### Interventions:

- Group: ERAS Group

Intervention: Perioperative ERAS protocol for Neurosurgery    Sample size: 120

- Group: Control Group

Intervention: Conventional neurosurgery perioperative management    Sample size: 120

#### Countries of recruitment and research settings:

Country: China                  Province: Shaanxi                  City: Xi'an

Institution hospital: Tangdu Hospital                  Level of the institution: Tertiary A hospital

## Flow Diagram

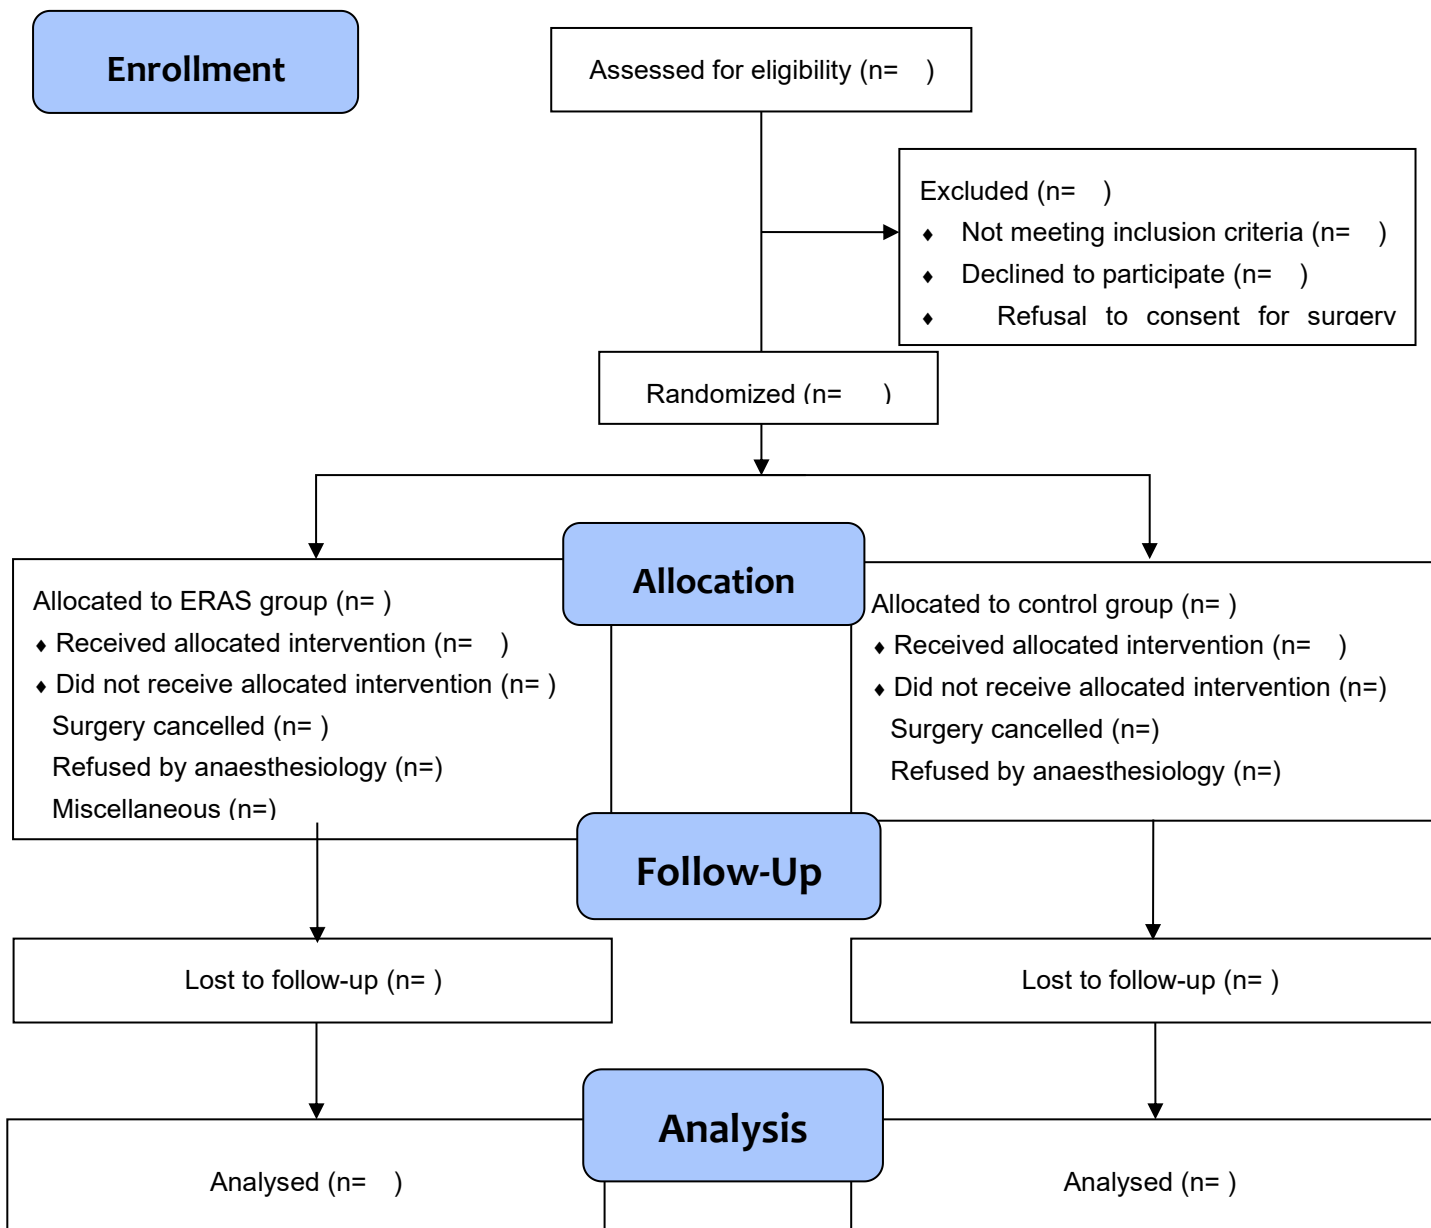

From Oct 2016 to Nov 2017, patients aged from 18 to 65 years, who were admitted for elective craniotomies at Department of Neurosurgery, Tangdu Hospital were enrolled for this study. After obtaining informed consents, patients were prospectively randomized into two groups by simple randomization procedures (computerized random numbers) by the research coordinator. Due to the requirement for active patient participation, it was not possible to perform the study with blinded participants and care providers. Only those who collected and assessed outcomes were blinded.

We were supported by the local institutional ethical committee to develop a neurosurgical ERAS protocol through a quality patient care initiative. Institutional review board (IRB) approval was also obtained prior to consenting patients for this study. In June 2016, we set up a Neurosurgical ERAS Working Group, including clinicians and ancillary staff from neurosurgery, anesthesiology, in-patient and operative nursing, as well as nutrition services. This multidisciplinary working group was then used to develop and apply the neurosurgical ERAS protocol outlined in this study. The protocol was designed for patients undergoing elective craniotomy, and adapted from concepts elicited from other established protocols for general surgery and was done after an extensive review of the current evidence-based perioperative care interventions supported in the literature. However, some critical concepts for abdominal and/or pelvic surgery do not apply to neurosurgical patients, and were thus excluded from our protocol. In addition, we reviewed the published literature on other successful ERAS protocols, particularly the preliminary ERAS recommendations for oncological craniotomy proposed by Hagan et al<sup>[10]</sup>.

Outcome measurements:

Data were collected from patient demographic data (age, sex), preoperative nutritional record (total bodyweight, body mass index), preoperative co-morbidity status (American association of anesthesiologists grades, ASA grades) and other presenting physical characteristics (smoking, diabetes, history of post-operative nausea and vomiting (PONV), motion sickness, hypertension, hypercholesterolemia, etc.) were assessed and recorded at admission.

Data of surgical procedures like types of operation, lesion locations (supratentorial superficial lesion, supratentorial deep-seated lesion or infratentorial lesion), length of procedure, blood loss, blood transfusion and intraoperative fluid were assessed.

The primary end point was the evaluation of postoperative pain by means of a verbal NRS ranging from 0 to 10, with 0 representing no pain and 10 representing the worst pain imaginable. Postoperative pain was recorded from 1 day after extubation in the neurosurgical intensive care unit to the day of discharge. The nonopioid analgesic drugs, weak opioid analgesics (+ nonopioid analgesic drugs) and strong opioid analgesics (+ nonopioid analgesic drugs) were administered for postoperative pain treatment depending on the assessment and decision of the attending team.

Secondary outcome measures included median of the total hospital length of stay from admission to discharge, median of post procedure length of stay from end of procedure to discharge, readmission rate within 30 days, reoperation rate within 30 days and total cost of hospitalization (RMB).

## **Safety Considerations**

- **Assessment of safety:**

Safety data will be inclusive of all adverse effects (AEs), from the point of subject enrolment to the final follow-up visit or discontinuation, whichever comes first. Reports of AEs will minimally include the following information; date of event; diagnosis or description of the event; assessment of the seriousness; treatment; outcome and date.

- **Discharge criteria:**

Patients in this study, either in ERAS or control group, were discharged once they met our predefined discharge criteria, which included: adequate pain management with oral analgesia, adequate intake of solid food, without the need for intravenous fluids, no fever, independent mobility and a safe disposition home. The decision to discharge was made via the consensus of two senior attending physicians in the department of Neurosurgery, who were instructed to follow the discharging criteria, and were independent of the researchers involved in this study.

## **Follow-Up**

Data on patient characteristics, intraoperative parameters and perioperative course were collected during the hospitalization and at the 4 months follow-up.

## **Data Management and Statistical Analysis**

Descriptive statistics of ERAS group and control group were compared for all relevant patient characteristics. To compensate for potential dropouts, patients were enrolled. Interim analysis was planned when the minimal number of the predefined sample size was met. Continuous data with a normal distribution were statistically tested for group differences using chi-square test and Fisher's exact test. Logistic regression and chi-square test were used to assess the potential relationship between incidence and severity of pain and potential influencing factors. The statistical analysis was performed with SPSS program for Windows (Ver. 19, IBM Corp., Armonk, NY). A P value of  $<0.05$  was considered to be statistically significant.

## **Expected Outcomes of the Study**

This multidisciplinary evidence-based neurosurgical ERAS protocol for elective craniotomies appears to have significant benefits compared to the conventional care. Implementation of a neurosurgical ERAS protocol for elective craniotomies, which resulted in alleviating postoperative pain and enhancing recovery after surgery.

## **Dissemination of Results and Publication Policy**

Final study results and conclusions will be presented at international conferences and publications in peer-reviewed journals.

**Duration of the Project:** From Oct 2016 to Nov 2017

## **Problems Anticipated**

First, the subgroup analysis was need to perform with all consecutive patients within the ERAS pathway and conventional surgery protocol. Postoperative pain management is embedded in a multidisciplinary cooperation and the impact of pain management on recovery, pain relief, and length of stay needs to be interpreted in this context. Second, little information was known regarding the individual contribution of the interventions, which may be investigated in further studies. As mentioned in the Methods section, the enhanced recovery pathway was adapted during

the study period. To avoid the bias of various perioperative care pathways and unbalanced interventions.

### **Ethics**

Informed consent was obtained from all individual participants or their legal representatives included in this study. The analysis and usage of patient information for this study was approved by the Ethical Committee of Tangdu Hospital. And the methods were carried out in accordance with the approved guidelines. This randomized control trial (RCT) was registered at Chinese Clinical Trial Registry (Registration date: October 27, 2016, <http://www.chictr.org.cn/showproj.aspx?proj=16480>) with registration number ChiCTR-INR-16009662.

### **Informed Consent Forms**

The approved version of the protocol must have copies of informed consent forms (ICF), both in English and the local language in which they are going to be administered.

### **References**

1. Ren L, Zhu D, Wei Y, Pan X, Liang L, Xu J, et al. Enhanced Recovery After Surgery (ERAS) program attenuates stress and accelerates recovery in patients after radical resection for colorectal cancer: a prospective randomized controlled trial. *World J Surg.* 2012; 36: 407-14.
2. Kehlet H, Wilmore DW. Multimodal strategies to improve surgical outcome. *American journal of surgery.* 2002; 183: 630-41.
3. Ljungqvist O, Scott M, Fearon KC. Enhanced Recovery After Surgery: A Review. *JAMA surgery.* 2017; 152: 292-8.
4. Cerantola Y, Valerio M, Persson B, Jichlinski P, Ljungqvist O, Hubner M, et al. Guidelines for perioperative care after radical cystectomy for bladder cancer: Enhanced Recovery After Surgery (ERAS((R))) society recommendations. *Clinical nutrition.* 2013; 32: 879-87.
5. Melloul E, Hubner M, Scott M, Snowden C, Prentis J, Dejong CH, et al. Guidelines for Perioperative Care for Liver Surgery: Enhanced Recovery After Surgery (ERAS) Society Recommendations. *World J Surg.* 2016; 40: 2425-40.
6. Scott MJ, Baldini G, Fearon KC, Feldheiser A, Feldman LS, Gan TJ, et al. Enhanced Recovery After Surgery (ERAS) for gastrointestinal surgery, part 1: pathophysiological considerations. *Acta anaesthesiologica Scandinavica.* 2015; 59: 1212-31.
7. Mortensen K, Nilsson M, Slim K, Schafer M, Mariette C, Braga M, et al. Consensus guidelines for enhanced recovery after gastrectomy: Enhanced Recovery After Surgery (ERAS(R)) Society recommendations. *The British journal of surgery.* 2014; 101: 1209-29.
8. Thorell A, MacCormick AD, Awad S, Reynolds N, Roulin D, Demartines N, et al. Guidelines for Perioperative Care in Bariatric Surgery: Enhanced Recovery After Surgery (ERAS) Society Recommendations. *World J Surg.* 2016; 40: 2065-83.
9. Garrett M, Consiglieri G, Nakaji P. Transcranial minimally invasive neurosurgery for tumors. *Neurosurgery clinics of North America.* 2010; 21: 595-605, v.
10. Hagan KB, Bhavsar S, Raza SM, Arnold B, Arunkumar R, Dang A, et al. Enhanced recovery after surgery for oncological craniotomies. *Journal of clinical neuroscience : official journal of the Neurosurgical Society of Australasia.* 2016; 24: 10-6.





|                        |                                |                                                                                                                                                                                                 |                                                                                                                                                    |
|------------------------|--------------------------------|-------------------------------------------------------------------------------------------------------------------------------------------------------------------------------------------------|----------------------------------------------------------------------------------------------------------------------------------------------------|
|                        | Pre-op last defecation time    | Operational day morning <input type="checkbox"/><br>Pre-op: 1d <input type="checkbox"/> 2d <input type="checkbox"/> >2d <input type="checkbox"/>                                                |                                                                                                                                                    |
|                        | Pre-op intestinal intervention | NO <input type="checkbox"/> YES <input type="checkbox"/><br>→ Cleansing Enema <input type="checkbox"/> Glycerol Enema <input type="checkbox"/> Others: _____                                    |                                                                                                                                                    |
| Preoperative nursing   | Area of skin preservation      | Total Shaving <input type="checkbox"/> Partial Shaving <input type="checkbox"/><br>2cm Shaving around the incision <input type="checkbox"/>                                                     |                                                                                                                                                    |
|                        | Hair cleaning                  | YES <input type="checkbox"/> NO <input type="checkbox"/>                                                                                                                                        |                                                                                                                                                    |
|                        | Gargle/nasal drops usage       | NO <input type="checkbox"/> YES <input type="checkbox"/> → for _____ days                                                                                                                       |                                                                                                                                                    |
|                        | pre-op pulmonary protection    | NO <input type="checkbox"/> YES <input type="checkbox"/> → Ambroxol <input type="checkbox"/> Budesonide <input type="checkbox"/>                                                                |                                                                                                                                                    |
|                        | Fasting solid food             | 6h <input type="checkbox"/> 8h <input type="checkbox"/> 10h <input type="checkbox"/> 12h <input type="checkbox"/>                                                                               |                                                                                                                                                    |
|                        | Intake nutrient solution       | 2h <input type="checkbox"/> 4h <input type="checkbox"/> 6h <input type="checkbox"/> 8h <input type="checkbox"/> NO <input type="checkbox"/> Preoperative fasting<br>Glucose level: _____ mmol/l |                                                                                                                                                    |
|                        | Intake glucose liquid          | 2h <input type="checkbox"/> 4h <input type="checkbox"/> 6h <input type="checkbox"/> 8h <input type="checkbox"/> NO <input type="checkbox"/> Glucose level prior<br>To the or: _____ mmol/l      |                                                                                                                                                    |
|                        | Last pre-op liquid food        | 4h <input type="checkbox"/> 6h <input type="checkbox"/> 8h <input type="checkbox"/>                                                                                                             |                                                                                                                                                    |
|                        | Pre-op nausea & vomiting       | NO <input type="checkbox"/> YES <input type="checkbox"/> → score: _____ medicine and dose: _____                                                                                                |                                                                                                                                                    |
| Operating Room Nursing | OR parameters                  | Room Temperature: _____ °C Humidity: _____ %                                                                                                                                                    |                                                                                                                                                    |
|                        | OR stay time                   | Entry Time: _____ Hour : Min _____ ; Leave Time: _____ Hour : Min _____ ; Total: _____ Hour : Min _____                                                                                         |                                                                                                                                                    |
|                        | Surgical time                  | Begin: _____ Hour : Min _____ Finish: _____ Hour : Min _____ Total: _____ Hour : Min _____                                                                                                      |                                                                                                                                                    |
|                        | Entry conscious state          | Sober <input type="checkbox"/> Somnolence <input type="checkbox"/> Lethargy <input type="checkbox"/> Light Coma <input type="checkbox"/>                                                        |                                                                                                                                                    |
|                        | Psychological status           | Nervous <input type="checkbox"/> Anxiety <input type="checkbox"/> Calm <input type="checkbox"/> Indifferent <input type="checkbox"/>                                                            |                                                                                                                                                    |
|                        | Urinary catheterization        | Post general anesthesia <input type="checkbox"/><br>Before general anesthesia <input type="checkbox"/>                                                                                          |                                                                                                                                                    |
|                        | Antibiotic prophylaxis         | Medicine: _____ Dose: _____<br>Additional dose: YES <input type="checkbox"/> NO <input type="checkbox"/>                                                                                        |                                                                                                                                                    |
|                        | Transfusion reaction           | <input type="checkbox"/> NO adverse transfusion reactions <input type="checkbox"/> YES, † <b>Special Case Records</b>                                                                           |                                                                                                                                                    |
|                        | Avoiding hypothermia           | Body temp                                                                                                                                                                                       | Entry temp: _____ °C Maintain to: <36°C <input type="checkbox"/> 36-37°C <input type="checkbox"/> >37°C <input type="checkbox"/>                   |
|                        |                                | Heating pad                                                                                                                                                                                     | YES <input type="checkbox"/> NO <input type="checkbox"/> heated to _____ °C                                                                        |
|                        |                                | Intravenous fluid administration                                                                                                                                                                | YES <input type="checkbox"/> NO <input type="checkbox"/> heated to _____ °C                                                                        |
|                        |                                | Flushing fluid                                                                                                                                                                                  | YES <input type="checkbox"/> NO <input type="checkbox"/> heated to _____ °C                                                                        |
|                        | VTE prevent                    | Measures                                                                                                                                                                                        | Compression Stocking <input type="checkbox"/> Pneumatic Pump <input type="checkbox"/> Medication: _____                                            |
|                        |                                | Intra-op                                                                                                                                                                                        | Supine Position <input type="checkbox"/> Lateral Position <input type="checkbox"/> (Left <input type="checkbox"/> Right <input type="checkbox"/> ) |

|                               |                                      |                             |                                                                                                                                                                                                             |                                                                                                                                                                                                                              |                              |                                                                                         |                              |                             |
|-------------------------------|--------------------------------------|-----------------------------|-------------------------------------------------------------------------------------------------------------------------------------------------------------------------------------------------------------|------------------------------------------------------------------------------------------------------------------------------------------------------------------------------------------------------------------------------|------------------------------|-----------------------------------------------------------------------------------------|------------------------------|-----------------------------|
|                               |                                      | position                    | Prone Position <input type="checkbox"/> Sitting Position <input type="checkbox"/> Others:                                                                                                                   |                                                                                                                                                                                                                              |                              |                                                                                         |                              |                             |
|                               |                                      | Pressure area care          | <input type="checkbox"/> Head (Occipital. Ears, Eyes) <input type="checkbox"/> The Trunk (Shoulder. Iliac Spine. Sacral Tail) <input type="checkbox"/> Limbs (Elbows, Knees, Heels. Toes)                   |                                                                                                                                                                                                                              |                              |                                                                                         |                              |                             |
|                               |                                      | Care frequency              | 1-2 <input type="checkbox"/>                                                                                                                                                                                | 3-4 <input type="checkbox"/>                                                                                                                                                                                                 | 5-6 <input type="checkbox"/> | 7-8 <input type="checkbox"/> 9-10 <input type="checkbox"/> >10 <input type="checkbox"/> |                              |                             |
| <b>Anesthesia management</b>  | Anesthesia time                      |                             | Begin: <u>    </u> Hour : <u>    </u> Min    Finish: <u>    </u> Hour : <u>    </u> Min    Total: <u>    </u> Hour : <u>    </u> Min                                                                        |                                                                                                                                                                                                                              |                              |                                                                                         |                              |                             |
|                               | Types of anesthesia                  |                             | Intravenous <input type="checkbox"/> Inhalational <input type="checkbox"/> Anesthesia <input type="checkbox"/>                                                                                              |                                                                                                                                                                                                                              |                              |                                                                                         |                              |                             |
|                               | Monitored parameters                 |                             | EEG <input type="checkbox"/> Cardiac Output <input type="checkbox"/> Muscle Relaxants <input type="checkbox"/><br>Body Temp <input type="checkbox"/> Arterial Blood Gases Analysis <input type="checkbox"/> |                                                                                                                                                                                                                              |                              |                                                                                         |                              |                             |
|                               | Pre-op scalp incision anesthesia     |                             | NO <input type="checkbox"/> YES <input type="checkbox"/> → Medicine: Ropivacaine <input type="checkbox"/> Others:                                                                                           |                                                                                                                                                                                                                              |                              |                                                                                         |                              |                             |
|                               | Post-op scalp incision anesthesia    |                             | NO <input type="checkbox"/> YES <input type="checkbox"/> → Medicine: Ropivacaine <input type="checkbox"/> Others:                                                                                           |                                                                                                                                                                                                                              |                              |                                                                                         |                              |                             |
|                               | Intraoperative circulation           |                             | <input type="checkbox"/> Stable <input type="checkbox"/> Low Perfusion    Duration: <u>    </u> min<br><b>(†Special Case Records)</b>                                                                       |                                                                                                                                                                                                                              |                              |                                                                                         |                              |                             |
|                               | liquid discharging                   |                             | Blood loss: <u>    </u> ml    urinary volume: <u>    </u> ml    total: <u>    </u> ml                                                                                                                       |                                                                                                                                                                                                                              |                              |                                                                                         |                              |                             |
|                               | Liquid loading                       |                             | Crystalloid solution: <u>    </u> ml    Colloidal solution: <u>    </u> ml<br>Total: <u>    </u> ml                                                                                                         |                                                                                                                                                                                                                              |                              |                                                                                         |                              |                             |
|                               | Transfused blood                     |                             | <input type="checkbox"/> NO <input type="checkbox"/> YES: Erythrocyte <u>    </u> U, Plasma <u>    </u> ml, Cryo <u>    </u> U                                                                              |                                                                                                                                                                                                                              |                              |                                                                                         |                              |                             |
|                               | Transfusion reaction                 |                             | <input type="checkbox"/> NO <input type="checkbox"/> YES <b>†Special Case Records</b>                                                                                                                       |                                                                                                                                                                                                                              |                              |                                                                                         |                              |                             |
|                               | Consciousness                        |                             | 0 <input type="checkbox"/> 1 <input type="checkbox"/> 2 <input type="checkbox"/> 3 <input type="checkbox"/> 4 <input type="checkbox"/>                                                                      |                                                                                                                                                                                                                              |                              |                                                                                         |                              |                             |
|                               | Steward grade                        |                             | Total ( ) = Consciousness ( ) + Breath ( ) + Body Movement ( )                                                                                                                                              |                                                                                                                                                                                                                              |                              |                                                                                         |                              |                             |
|                               | Extubation before leaving OR         |                             | YES <input type="checkbox"/> breathing without extubation <input type="checkbox"/> NO breath <input type="checkbox"/>                                                                                       |                                                                                                                                                                                                                              |                              |                                                                                         |                              |                             |
| <b>Surgical manipulations</b> | Pre-op mucosal protection            |                             | <input type="checkbox"/> NO <input type="checkbox"/> YES → medicine: <u>    </u>                                                                                                                            |                                                                                                                                                                                                                              |                              |                                                                                         |                              |                             |
|                               | Drainage tube                        |                             | <input type="checkbox"/> NO <input type="checkbox"/> YES → Quantity: <u>    </u><br>Position: <input type="checkbox"/> Surgical Field <input type="checkbox"/> Epidural <input type="checkbox"/> EVD        |                                                                                                                                                                                                                              |                              |                                                                                         |                              |                             |
|                               | Drainage removal                     |                             | <24h <input type="checkbox"/> 24-48h <input type="checkbox"/> >48h <input type="checkbox"/>                                                                                                                 |                                                                                                                                                                                                                              |                              |                                                                                         |                              |                             |
|                               | Duraplasty                           |                             | Absorbable suture <input type="checkbox"/> Non-absorbable suture <input type="checkbox"/> (Tight <input type="checkbox"/> Un-Tight <input type="checkbox"/> )                                               |                                                                                                                                                                                                                              |                              |                                                                                         |                              |                             |
|                               | Subcutaneous suture                  |                             | Absorbable suture <input type="checkbox"/><br>Non-Absorbable suture <input type="checkbox"/> (Intermittent stitching <input type="checkbox"/> Continuous stitching <input type="checkbox"/> )               |                                                                                                                                                                                                                              |                              |                                                                                         |                              |                             |
|                               | Skin suture                          |                             | Absorbable suture <input type="checkbox"/><br>Non-Absorbable Suture <input type="checkbox"/> Stapler <input type="checkbox"/> (Intradermal <input type="checkbox"/> Intermittent <input type="checkbox"/> ) |                                                                                                                                                                                                                              |                              |                                                                                         |                              |                             |
| <b>Postoperative</b>          | <b>Postoperative pain management</b> | Pain location               |                                                                                                                                                                                                             | <input type="checkbox"/> Surgical Area <input type="checkbox"/> Head <input type="checkbox"/> Other:                                                                                                                         |                              |                                                                                         |                              |                             |
|                               |                                      | Characteristic of pain      |                                                                                                                                                                                                             | Dull <input type="checkbox"/> Stinging <input type="checkbox"/> Swelling Pain <input type="checkbox"/><br>Compressive <input type="checkbox"/> (Intermittent <input type="checkbox"/> Persistence <input type="checkbox"/> ) |                              |                                                                                         |                              |                             |
|                               |                                      | Numeric rating scales (NRS) |                                                                                                                                                                                                             | POD 1                                                                                                                                                                                                                        | 1-3 <input type="checkbox"/> | 4-6 <input type="checkbox"/>                                                            | 7-9 <input type="checkbox"/> | 10 <input type="checkbox"/> |
|                               |                                      |                             |                                                                                                                                                                                                             | POD 2                                                                                                                                                                                                                        | 1-3 <input type="checkbox"/> | 4-6 <input type="checkbox"/>                                                            | 7-9 <input type="checkbox"/> | 10 <input type="checkbox"/> |
|                               |                                      |                             |                                                                                                                                                                                                             | POD 3                                                                                                                                                                                                                        | 1-3 <input type="checkbox"/> | 4-6 <input type="checkbox"/>                                                            | 7-9 <input type="checkbox"/> | 10 <input type="checkbox"/> |
| POD 4                         | 1-3 <input type="checkbox"/>         |                             |                                                                                                                                                                                                             | 4-6 <input type="checkbox"/>                                                                                                                                                                                                 | 7-9 <input type="checkbox"/> | 10 <input type="checkbox"/>                                                             |                              |                             |

|                                  |                                                                                  |                                                                                                                                                                                                                                 |                                                                                                                                     |
|----------------------------------|----------------------------------------------------------------------------------|---------------------------------------------------------------------------------------------------------------------------------------------------------------------------------------------------------------------------------|-------------------------------------------------------------------------------------------------------------------------------------|
|                                  | Duration                                                                         | 1-2d <input type="checkbox"/> 2-3d <input type="checkbox"/> 3-4d <input type="checkbox"/>                                                                                                                                       |                                                                                                                                     |
|                                  | Analgesics                                                                       | <input type="checkbox"/> NO <input type="checkbox"/> YES: Phase 1 <input type="checkbox"/> Phase 1 <input type="checkbox"/> Phase 1 <input type="checkbox"/> medicine:_____                                                     |                                                                                                                                     |
|                                  | PCA                                                                              | <input type="checkbox"/> NO <input type="checkbox"/> YES medicine:_____                                                                                                                                                         |                                                                                                                                     |
|                                  | Respiratory management                                                           | Atomization: <input type="checkbox"/> NO <input type="checkbox"/> YES medicine:_____<br>Intravenous infusion: <input type="checkbox"/> NO <input type="checkbox"/> YES medicine:_____                                           |                                                                                                                                     |
|                                  | Epilepsy prevention                                                              | <input type="checkbox"/> NO <input type="checkbox"/> YES: Sodium Valproate <input type="checkbox"/> Oxcarbazepine <input type="checkbox"/><br>Phenobarbital <input type="checkbox"/> Others <input type="checkbox"/> :_____     |                                                                                                                                     |
|                                  | Digestive system management                                                      | Mucosa protection                                                                                                                                                                                                               | Omeprazole <input type="checkbox"/> Esomeprazole <input type="checkbox"/> Others <input type="checkbox"/> :_____                    |
|                                  |                                                                                  | Vomiting prevention                                                                                                                                                                                                             | <input type="checkbox"/> NO <input type="checkbox"/> YES medicine:_____                                                             |
|                                  |                                                                                  | Nausea grade                                                                                                                                                                                                                    | <input type="checkbox"/> NO <input type="checkbox"/> Slight <input type="checkbox"/> Mild <input type="checkbox"/> Severe           |
|                                  |                                                                                  | Vomit grade                                                                                                                                                                                                                     | Grade 0 <input type="checkbox"/> Grade 1 <input type="checkbox"/> Grade 2 <input type="checkbox"/> Grade 3 <input type="checkbox"/> |
|                                  |                                                                                  | PONV VAS score                                                                                                                                                                                                                  | 1~4 <input type="checkbox"/> 5~6 <input type="checkbox"/> 7~10 <input type="checkbox"/>                                             |
|                                  |                                                                                  | Antiemetic drug                                                                                                                                                                                                                 | <input type="checkbox"/> NO <input type="checkbox"/> YES medicine: _____                                                            |
|                                  | Re-examination CT scan                                                           | Good <input type="checkbox"/> Hematoma <input type="checkbox"/> Edema <input type="checkbox"/> Infarction <input type="checkbox"/><br>Detailed Description: _____                                                               |                                                                                                                                     |
|                                  | Post-op complications                                                            | NO <input type="checkbox"/> YES <input type="checkbox"/> : Complications: _____                                                                                                                                                 |                                                                                                                                     |
| Daily liquid loading             | POD1: _____ml; POD2:_____ml; POD3:_____ml; POD4:_____ml                          |                                                                                                                                                                                                                                 |                                                                                                                                     |
| Wound healing                    | A <input type="checkbox"/> B <input type="checkbox"/> C <input type="checkbox"/> |                                                                                                                                                                                                                                 |                                                                                                                                     |
| Postoperative Nursing Management | Extubating time                                                                  | Already extubated <input type="checkbox"/> 0-2h <input type="checkbox"/> 2-4h <input type="checkbox"/> 4-6h <input type="checkbox"/> >6h <input type="checkbox"/>                                                               |                                                                                                                                     |
|                                  | Time for removing urinary catheter                                               | 6h <input type="checkbox"/> <24h <input type="checkbox"/> >24h <input type="checkbox"/>                                                                                                                                         |                                                                                                                                     |
|                                  | Prophylactic thrombosis                                                          | Compression stocking <input type="checkbox"/> NO <input type="checkbox"/> YES<br>Pneumatic pump <input type="checkbox"/> NO <input type="checkbox"/> YES Limb movement <input type="checkbox"/> NO <input type="checkbox"/> YES |                                                                                                                                     |
|                                  | Post-op Braden score                                                             | >18 <input type="checkbox"/> 18-15 <input type="checkbox"/> 14~13 <input type="checkbox"/> 12~10 <input type="checkbox"/> ≤9 <input type="checkbox"/>                                                                           |                                                                                                                                     |
|                                  | On-bed exercise                                                                  | Immediately after awaken <input type="checkbox"/> 4-8h after awaken <input type="checkbox"/> >8h after awaken <input type="checkbox"/>                                                                                          |                                                                                                                                     |
|                                  | Ambulation                                                                       | 1d <input type="checkbox"/> 2d <input type="checkbox"/> 3d <input type="checkbox"/> 4d <input type="checkbox"/>                                                                                                                 |                                                                                                                                     |
|                                  | Intake water                                                                     | 4h <input type="checkbox"/> 6h <input type="checkbox"/> 8h <input type="checkbox"/> 12h <input type="checkbox"/> 24h <input type="checkbox"/> >24h <input type="checkbox"/>                                                     |                                                                                                                                     |
|                                  | Intake nutrient solution                                                         | 6h <input type="checkbox"/> 8h <input type="checkbox"/> 12h <input type="checkbox"/> 24h <input type="checkbox"/> >24h <input type="checkbox"/>                                                                                 |                                                                                                                                     |
|                                  | Intake liquid food                                                               | 6h <input type="checkbox"/> 8h <input type="checkbox"/> 10h <input type="checkbox"/> 12h <input type="checkbox"/> 24h <input type="checkbox"/> 36h <input type="checkbox"/>                                                     |                                                                                                                                     |
|                                  | Intake solid food                                                                | 24h <input type="checkbox"/> 24-48h <input type="checkbox"/> >48h <input type="checkbox"/>                                                                                                                                      |                                                                                                                                     |
|                                  | Parenteral nutrition                                                             | <input type="checkbox"/> NO <input type="checkbox"/> YES medicine: _____                                                                                                                                                        |                                                                                                                                     |
|                                  | Post-op i.v. stop time                                                           | 2d <input type="checkbox"/> 3d <input type="checkbox"/> 4d <input type="checkbox"/> 5d <input type="checkbox"/> >5d <input type="checkbox"/>                                                                                    |                                                                                                                                     |

|                                           |                                  |                                                                                                                                                                                                                                                                                                                                                                                                                                 |
|-------------------------------------------|----------------------------------|---------------------------------------------------------------------------------------------------------------------------------------------------------------------------------------------------------------------------------------------------------------------------------------------------------------------------------------------------------------------------------------------------------------------------------|
|                                           | Post-op complications            | Pulmonary infection: <input type="checkbox"/> NO <input type="checkbox"/> YES<br>Epilepsy: <input type="checkbox"/> NO <input type="checkbox"/> YES<br>Transfusion reaction: <input type="checkbox"/> NO <input type="checkbox"/> YES<br>DVT: <input type="checkbox"/> NO <input type="checkbox"/> YES<br>Gastrointestinal bleeding: <input type="checkbox"/> NO <input type="checkbox"/> YES<br><b>(†Special Case Records)</b> |
| <b>Discharge Evaluation</b>               | Nutritional status               | Height: ___(Cm)                      Weight: ___(Kg)<br>BMI: ___(Kg/M <sup>2</sup> )                      Body Fat: __ (Kg)<br>Lean Muscle Mass: ___(Kg)              Grip Strength: ___(Kg)                                                                                                                                                                                                                                    |
|                                           | SGA score                        | A <input type="checkbox"/> B <input type="checkbox"/> C <input type="checkbox"/>                                                                                                                                                                                                                                                                                                                                                |
|                                           | Mental state                     | Good <input type="checkbox"/> Fair <input type="checkbox"/> Poor <input type="checkbox"/> Others <input type="checkbox"/> : _____                                                                                                                                                                                                                                                                                               |
|                                           | HAD anxiety                      | 0-7 <input type="checkbox"/> 8-10 <input type="checkbox"/> 11-20 <input type="checkbox"/> (    )                                                                                                                                                                                                                                                                                                                                |
|                                           | HAD depression                   | 0-7 <input type="checkbox"/> 8-10 <input type="checkbox"/> 11-20 <input type="checkbox"/> (    )                                                                                                                                                                                                                                                                                                                                |
|                                           | KPS score                        | 100 <input type="checkbox"/> 90-80 <input type="checkbox"/> 80-70 <input type="checkbox"/> 70-60 <input type="checkbox"/> 60-50 <input type="checkbox"/> 50-30 <input type="checkbox"/> (    )                                                                                                                                                                                                                                  |
|                                           | Patient satisfaction             | >90 <input type="checkbox"/> 80-90 <input type="checkbox"/> <80 <input type="checkbox"/> (    )                                                                                                                                                                                                                                                                                                                                 |
|                                           | Hospitalization                  | Total cost of hospitalization:              RMB                                                                                                                                                                                                                                                                                                                                                                                 |
| Length of stay: _____ days                |                                  |                                                                                                                                                                                                                                                                                                                                                                                                                                 |
| Post-operative length of stay: _____ days |                                  |                                                                                                                                                                                                                                                                                                                                                                                                                                 |
| <b>Follow-Up</b>                          | 1 <sup>st</sup> Follow-up time   | 2 Weeks <input type="checkbox"/> 4 Weeks <input type="checkbox"/> Others:                                                                                                                                                                                                                                                                                                                                                       |
|                                           | 1 <sup>st</sup> Follow-up method | Telephone <input type="checkbox"/> Office Visit <input type="checkbox"/> Others <input type="checkbox"/> :                                                                                                                                                                                                                                                                                                                      |
|                                           | 1 <sup>st</sup> KPS score        | 100 <input type="checkbox"/> 90-80 <input type="checkbox"/> 80-70 <input type="checkbox"/> 70-60 <input type="checkbox"/> 60-50 <input type="checkbox"/> 50-30 <input type="checkbox"/> (    )                                                                                                                                                                                                                                  |
|                                           | 2 <sup>nd</sup> Follow-up time   | 2 Weeks <input type="checkbox"/> 4 Weeks <input type="checkbox"/> Others:                                                                                                                                                                                                                                                                                                                                                       |
|                                           | 2 <sup>nd</sup> Follow-up method | Telephone <input type="checkbox"/> Office Visit <input type="checkbox"/> Others <input type="checkbox"/> :                                                                                                                                                                                                                                                                                                                      |
|                                           | 2 <sup>nd</sup> KPS score        | 100 <input type="checkbox"/> 90-80 <input type="checkbox"/> 80-70 <input type="checkbox"/> 70-60 <input type="checkbox"/> 60-50 <input type="checkbox"/> 50-30 <input type="checkbox"/> (    )                                                                                                                                                                                                                                  |

## Supplementary file 3. ERAS Protocol For Elective Craniotomies

| Phase                             | Items                                              | Control group                                                                                   |                                                                                                                                                       | ERAS group                                                                                                         |                                                                                                                                                       | ERAS recommendation elements                                             |
|-----------------------------------|----------------------------------------------------|-------------------------------------------------------------------------------------------------|-------------------------------------------------------------------------------------------------------------------------------------------------------|--------------------------------------------------------------------------------------------------------------------|-------------------------------------------------------------------------------------------------------------------------------------------------------|--------------------------------------------------------------------------|
|                                   |                                                    | Content                                                                                         | Procedures                                                                                                                                            | Content                                                                                                            | Procedures                                                                                                                                            |                                                                          |
| <b>Admission</b>                  | Evaluation                                         | Based on the inclusion criteria and random number, patients were enrolled in the Control group. | Sign the Informed Consent on ERAS for neurosurgery                                                                                                    | Based on the inclusion criteria and random number, patients were enrolled in the ERAS group.                       | Sign the Informed Consent on ERAS for neurosurgery                                                                                                    |                                                                          |
| <b>Pre-operational evaluation</b> | Preoperative counseling                            | Outpatient and pre-hospital consultation                                                        |                                                                                                                                                       | Outpatient and pre-hospital consultation                                                                           |                                                                                                                                                       | √ Preoperative counseling                                                |
|                                   | Preoperative functional status evaluation          | Pre-operative KPS score                                                                         |                                                                                                                                                       | Pre-operative KPS score                                                                                            | Preoperative KPS assessment                                                                                                                           |                                                                          |
|                                   | Preoperative smoking and alcohol consumption       | Abstinence from both alcohol and smoking at least for 2 weeks                                   |                                                                                                                                                       | Abstinence from both alcohol and smoking at least for 2 weeks                                                      | Quit smoking and drinking                                                                                                                             | √ Preoperative smoking and alcohol consumption                           |
|                                   | Mental state assessment                            | Anxiety and depression evaluation                                                               | Hospital Anxiety and Depression Scale (HADS)                                                                                                          | Anxiety and depression evaluation                                                                                  | Hospital Anxiety and Depression Scale (HADS)                                                                                                          |                                                                          |
|                                   | Nutritional assessment                             | NRS2002, nutritional status assessment                                                          | Administration of nutritional therapy if necessary                                                                                                    | NRS2002, nutritional status assessment, PG-SGA                                                                     | Administration of nutritional therapy if necessary                                                                                                    | √ Preoperative enteral nutrition and perioperative oral immune nutrition |
|                                   | Evaluation and prophylactic antithrombotic therapy | Based on VTE Caprini Risk Assessment Scale & Autar DVT Risk Scale                               | 1. Lower limbs active/passive activity<br>2. Lower limbs with graduated compression stockings<br>3. intermittent pneumatic compression pump treatment | VTE Caprini Risk Assessment & Autar DVT Risk Assessment Scale                                                      | 1. Lower limbs active/passive activity<br>2. Lower limbs with graduated compression stockings<br>3. Intermittent pneumatic compression pump treatment | √ Anti-thrombotic prophylaxis                                            |
| PONV risk score                   | PONV Simple Risk Assessment Scale                  | No prophylaxis                                                                                  | PONV Simple Risk Assessment Scale                                                                                                                     | Prophylaxis: Score $\geq 3$ , preventive vomiting treatment, dexamethasone, 5-HT receptor antagonist (tropisetron) | √ PONV                                                                                                                                                |                                                                          |
| <b>Preoperative preparation</b>   | Preoperative intestinal intervention               | No                                                                                              | No                                                                                                                                                    | Defecation condition                                                                                               | Glycerine Enema induction if long history of constipation or $\geq 2$ days without defecation                                                         |                                                                          |

## Supplementary file 3. ERAS Protocol For Elective Craniotomies

| Phase                    | Items                                          | Control group                                                                           |                                                                                    | ERAS group                                                                              |                                                                                                                                                                                                                                                                                                                                      | ERAS recommendation elements                                           |
|--------------------------|------------------------------------------------|-----------------------------------------------------------------------------------------|------------------------------------------------------------------------------------|-----------------------------------------------------------------------------------------|--------------------------------------------------------------------------------------------------------------------------------------------------------------------------------------------------------------------------------------------------------------------------------------------------------------------------------------|------------------------------------------------------------------------|
|                          |                                                | Content                                                                                 | Procedures                                                                         | Content                                                                                 | Procedures                                                                                                                                                                                                                                                                                                                           |                                                                        |
|                          | Antimicrobial prophylaxis and skin preparation | Routine scalp shaving                                                                   | Neurosurgeon's preference                                                          | Minimize scalp shaving                                                                  | 1. Washing hair with chlorhexidine<br>2. Routine prophylaxis with cefazolin within 1 hour prior to skin incision<br>3. Shaving 1.5-2 cm beyond the margin of the incision.                                                                                                                                                           | √ Antimicrobial prophylaxis and skin preparation                       |
|                          | Oral and nasal cavity preparation              | No                                                                                      | No                                                                                 | Mouthwash & nasal drops                                                                 | Apply mouthwash and nasal drops                                                                                                                                                                                                                                                                                                      |                                                                        |
|                          | Preoperative water fasting                     | Routine fasting water for 4 hours, fasting food for 6-8 hours                           | Follow the routine surgical procedure and surgeon's discretion                     | Preoperative 2-6 hours oral maltodextrin fructose solution (400 ml)                     | Fasting solid food for 6 hours<br>Oral intake maltodextrin fructose solution (400 ml) in the morning of operational day                                                                                                                                                                                                              | √ Preoperative fasting and carbohydrate loading                        |
|                          | Respiratory intervention                       | No                                                                                      | Physical exercise: chest movement, balloon blowing, abdominal breathing exercises. | Preoperative respiratory protection                                                     | 1. Oral and nasal cavity preparation: mouthwash and nasal drops.<br>2. Physical exercise: chest movement, balloon blowing, abdominal breathing exercises, cough training, inspiratory muscle training.<br>3. High risk factor intervention: Age, past and concomitant diseases, estimated surgical time, mucolytics and expectorants |                                                                        |
| <b>The operation day</b> | Scalp incision anesthesia                      | No                                                                                      | No                                                                                 | Ropivacaine (0.2%)                                                                      | 1. Subcutaneous local anesthesia before incision and wound suturing.<br>2. Add dose if operational time more than 3h                                                                                                                                                                                                                 | √ Scalp blocks                                                         |
|                          | Micro-invasive surgery for craniotomy          | Limited in minimally invasive craniotomies, excluding endoscopic skull base approaches. | Follow the minimal invasive neurosurgical procedure and surgeon's discretion       | Limited in minimally invasive craniotomies, excluding endoscopic skull base approaches. | Follow the minimal invasive neurosurgical procedure and surgeon's discretion                                                                                                                                                                                                                                                         | √ Minimally invasive craniotomies and endoscopic skull base approaches |
|                          | Anesthetic protocol                            | Intravenous-inhalation combined anesthesia                                              | Follow the routine anesthetic procedure.                                           | Intravenous-inhalation combined anesthesia                                              | Follow the institutional routine anesthetic procedure.                                                                                                                                                                                                                                                                               | √ Anesthetic protocol                                                  |

## Supplementary file 3. ERAS Protocol For Elective Craniotomies

| Phase | Items                          | Control group                                      |                                                                                                                                                                                             | ERAS group                                                           |                                                                                                                                                           | ERAS recommendation elements |
|-------|--------------------------------|----------------------------------------------------|---------------------------------------------------------------------------------------------------------------------------------------------------------------------------------------------|----------------------------------------------------------------------|-----------------------------------------------------------------------------------------------------------------------------------------------------------|------------------------------|
|       |                                | Content                                            | Procedures                                                                                                                                                                                  | Content                                                              | Procedures                                                                                                                                                |                              |
|       | Non-opioid analgesia           | Opioid analgesia are not usual administrated       | 1. Follow patient's feedbacks and surgeon's discretion.<br>2. Postoperative morphine and equivalent opioids were not usual prescribed only if the pain VAS $\geq$ 7 in craniotomy surgeries | Not usual administrated                                              | 1. Post-operative pain VAS $\geq$ 5: Acetaminophen or NSAIDS.<br>2. Postoperative VAS $\geq$ 7: Central analgesic drugs. Morphine and equivalent opioids. | √ Non-opioid analgesia       |
|       | Avoiding hypothermia           | Routine                                            | Non-invasive cardiac output monitoring to keep volume status and hemodynamic stability                                                                                                      | Measures to prevent hypothermia during the operation                 | 1. Forced-air and electric heating pad<br>2. Warmed liquid for infusion and washing                                                                       | √ Avoiding hypothermia       |
|       | Fluid balance                  | Restrictive protocol                               | 1. Goal-directed fluid restriction (GDFR) strategy<br>2. Non-invasive cardiac output monitoring to keep volume status and hemodynamic stability                                             | Restrictive protocol and warmed fluids.                              | 1. Goal-directed fluid restriction (GDFR) strategy<br>2. Non-invasive cardiac output monitoring to keep volume status and hemodynamic stability           | √ Fluid balance              |
|       | Stitching                      | Routine incision stitching                         |                                                                                                                                                                                             | Dural, subcutaneous tissue and skin are sutured by absorbable suture | Skin is treated with intradermal suture                                                                                                                   |                              |
|       | Drainage tube placement        | Place drainage tube for most surgeries.            |                                                                                                                                                                                             | Do not place drainage tube in exception of special circumstances     | If the drainage tube is placed, remove it within 48 hours if possible.                                                                                    |                              |
|       | Prophylactic antibiotics usage | Perioperative prophylactic antibiotics application | 1. First dose was given 30 and 60 minutes before the surgery.<br>2. Second dose used if a surgery lasts >4 hours.                                                                           | Perioperative prophylactic antibiotics application                   | 1. First dose was given 30 and 60 minutes before the surgery.<br>2. Second dose used if a surgery lasts >4 hours.                                         |                              |
|       | Pain management                | Patient-controlled analgesia (PCA)                 | PCA was given according to anesthetist's individual preference                                                                                                                              | Patient-controlled analgesia (PCA)                                   | Placement of PCA with mixed opioids and non-opioids at the end of surgery                                                                                 |                              |

## Supplementary file 3. ERAS Protocol For Elective Craniotomies

| Phase                              | Items                       | Control group                                                                                                        |                                                                                                                                                                                                                           | ERAS group                                                                                                                                                                                                                                                 |                                                                                                                                                                                                                                         | ERAS recommendation elements         |
|------------------------------------|-----------------------------|----------------------------------------------------------------------------------------------------------------------|---------------------------------------------------------------------------------------------------------------------------------------------------------------------------------------------------------------------------|------------------------------------------------------------------------------------------------------------------------------------------------------------------------------------------------------------------------------------------------------------|-----------------------------------------------------------------------------------------------------------------------------------------------------------------------------------------------------------------------------------------|--------------------------------------|
|                                    |                             | Content                                                                                                              | Procedures                                                                                                                                                                                                                | Content                                                                                                                                                                                                                                                    | Procedures                                                                                                                                                                                                                              |                                      |
| <b>Post-operational management</b> | Diet                        | POD 1-2: flow food<br>POD 3: semi-liquid diets<br>POD 4: semi-liquid diets + ordinary diets<br>POD 5: ordinary diets |                                                                                                                                                                                                                           | 1. 4 hours after awake: water<br>2. 6-12 hours: half of the nutrient solution (100 ml)<br>3. 12-24 hours: half of the nutrient solution + flow food<br>4. 24-48 hours: half of the nutrient solution + normal diet<br>5. 48 hours after: the ordinary diet | 1. POD1: 250-500ml nutrient solution<br>2. POD2: 500-1000ml nutrient solution + ordinary diet                                                                                                                                           | √ Postoperative artificial nutrition |
|                                    | Pain treatment              | Post-operative pain VAS score<br>Step analgesic measures                                                             | Score 4-6, NSAIDS<br>Score ≥7, Central analgesic drugs                                                                                                                                                                    | Post-operative pain VAS<br>Step analgesic measures                                                                                                                                                                                                         | Score 4-6, acetaminophen or NSAIDS<br>Score ≥7, central analgesic drugs                                                                                                                                                                 |                                      |
|                                    | Urinary drainage            | Used for the duration of the operation and early removal                                                             | Removal of the urinary drainage on POD 1-2                                                                                                                                                                                | Used for the duration of the operation and early removal                                                                                                                                                                                                   | Early removal of the urinary drainage within 6h.                                                                                                                                                                                        | √ Urinary drainage                   |
|                                    | Respiratory management      | Intravenous and atomized medicine administration                                                                     | 1. Expectorant + mucolytics (ambroxol hydrochloride) and/or bronchodilator.<br>2. Glucocorticoids (budesonide) + β2 agonists, inhalants (salbutamol) and/or anticholinergics/muscarinic antagonist (ipratropium bromide). | Intravenous and atomized medicine administration<br>Pharmacologic agents that promote airway clearance                                                                                                                                                     | 1. Expectorant + mucolytics (ambroxol hydrochloride) and/or bronchodilator.<br>2. Glucocorticoids (budesonide) + β2 agonists, inhalants (salbutamol) and/or anticholinergics/muscarinic antagonist (ipratropium bromide).               |                                      |
|                                    | Digestive system management | Mucosal protection                                                                                                   | PPIs (omeprazole, esomeprazole)                                                                                                                                                                                           | Mucosal protection                                                                                                                                                                                                                                         | PPIs (omeprazole, esomeprazole)                                                                                                                                                                                                         |                                      |
|                                    | PONV                        | PONV VAS                                                                                                             | 1. No prevention.<br>2. Intervention: dexamethasone, 5-HT receptor antagonist (tropisetron).<br>3. Severe case: droperidol, promethazine                                                                                  | PONV Simple Risk Assessment Scale<br>Prevention: 3-5 points, preventive anti-vomiting medicine.<br>Intervention: ≥5 points                                                                                                                                 | 1. Prevention: PONV VAS ≥3, apply dexamethasone, 5-HT receptor antagonist (tropisetron)<br>2. Intervention: PONV VAS ≥5, apply 5-HT receptor antagonist (tropisetron) again.<br>3. Severe cases: tropisetron + droperidol, promethazine | √ PONV                               |



## Supplementary file 3. ERAS Protocol For Elective Craniotomies

| Phase            | Items                                             | Control group                                                                                      |                                                                                                                | ERAS group                                                                                         |                                                                                                                | ERAS recommendation elements |
|------------------|---------------------------------------------------|----------------------------------------------------------------------------------------------------|----------------------------------------------------------------------------------------------------------------|----------------------------------------------------------------------------------------------------|----------------------------------------------------------------------------------------------------------------|------------------------------|
|                  |                                                   | Content                                                                                            | Procedures                                                                                                     | Content                                                                                            | Procedures                                                                                                     |                              |
|                  | Prophylactic antiepileptic drug therapy           | Prophylactic AED use is carefully considered                                                       | Prophylactic AED use is carefully considered during the perioperative course                                   | Prophylactic antiepileptic drug therapy discouraged.                                               | Insufficient evidence to recommend in favor or against postoperative prophylactic AED discontinuation          |                              |
|                  | Daily liquid volume                               | Routine liquid management                                                                          | POD 0-1:3000-2000 ml<br>POD 2: 2000 ml                                                                         | Rapid de-escalation of fluids                                                                      | POD 0-1: 1000-2000 ml<br>POD 2: 0-1000 ml                                                                      |                              |
|                  | Post-operational radiological assessment          | CT & MRI check after surgery                                                                       | Perform CT scan on POD 1.<br>Perform MRI scan within 3 days after surgery.                                     | CT & MRI check after surgery                                                                       | Perform CT scan on POD 1.<br>Perform MRI scan within 3 days after surgery.                                     |                              |
|                  | Preventive antithrombotic therapy                 | The day after the operation to patient discharge from hospital                                     | 1. Lower limbs active/passive activity<br>2. Lower limbs with elastic stockings<br>3. Pneumatic pump treatment | The day after the operation to patient discharge from hospital                                     | 1. Lower limbs active/passive activity<br>2. Lower limbs with elastic stockings<br>3. Pneumatic pump treatment |                              |
|                  | Early Off-bed activity and Ambulation             | Routine bed exercise and ambulation                                                                |                                                                                                                | Encourage early bed exercises and mobilization, with proper analgesia.                             | Bed exercises: 6 hours after awake<br>Early ambulation: 24 hours after surgery                                 | √ Early mobilization         |
|                  | Dressing change                                   | POD 2: change dressing, observe the healing of incision, and remove the drainage tube if possible. |                                                                                                                | POD 2: change dressing, observe the healing of incision, and remove the drainage tube if possible. |                                                                                                                |                              |
| <b>Discharge</b> | Evaluation of surgical incision healing           |                                                                                                    |                                                                                                                |                                                                                                    |                                                                                                                |                              |
|                  | evaluation of the quality of life                 | KPS score, satisfactory questionnaire                                                              |                                                                                                                | KPS score, satisfactory questionnaire                                                              |                                                                                                                |                              |
|                  | Evaluation of nutritional status when discharging | Nutritional assessment                                                                             |                                                                                                                | Nutritional assessment                                                                             | NRS2002, nutritional status assessment, PG-SGA                                                                 |                              |
|                  | Mental state assessment                           | Anxiety and depression evaluation                                                                  | Hospital Anxiety and Depression Scale (HADS)                                                                   | Anxiety and depression evaluation                                                                  | Hospital Anxiety and Depression Scale (HADS)                                                                   |                              |

## Supplementary file 3. ERAS Protocol For Elective Craniotomies

| Phase            | Items                             | Control group                                     |                     | ERAS group                                        |                     | ERAS recommendation elements |
|------------------|-----------------------------------|---------------------------------------------------|---------------------|---------------------------------------------------|---------------------|------------------------------|
|                  |                                   | Content                                           | Procedures          | Content                                           | Procedures          |                              |
| <b>Follow up</b> | evaluation of the quality of life | 2 weeks & 4 month after discharging from hospital | Out-patient revisit | 2 weeks & 4 month after discharging from hospital | Out-patient revisit |                              |
| <b>Audit</b>     | Audit                             | Assessing impact and encouraging compliance       |                     | Assessing impact and encouraging compliance       |                     | √ Audit                      |

ERAS: Enhanced recovery after surgery

KPS: Karnofsky Performance Status Scale (KPS)

VAS: Visual Analogue Scale

VTE: venous thromboembolism

DVT: Deep vein thrombosis

NRS 2002: Nutritional risk screening 2002

PG-SGA: Patient-Generated Subjective Global Assessment

PONV: Postoperative nausea and vomiting

POD: postoperative day

NSAIDS: Non-Steroidal Anti-inflammatory Drugs

PPI: proton pump inhibitors, PPIs

AED: antiepileptic drug.
